# Supplementary material for: Size matters: three methods for estimating nuclear size in mycorrhizal roots of Medicago truncatula by image analysis
Source: PubMed Central journal article supplement (PMC6500585; doi:10.1186/s12870-019-1791-1), 2019-05-04
Supplement: 12870_2019_1791_MOESM1_ESM.pdf [file 12870_2019_1791_MOESM1_ESM.pdf]

|                    | Manual measurements     |                         | TrackMate surface       |                         | RSD                     |                         | TrackMate Volume         |                          | 3D-OC                   |                         |
|--------------------|-------------------------|-------------------------|-------------------------|-------------------------|-------------------------|-------------------------|--------------------------|--------------------------|-------------------------|-------------------------|
|                    | Myc                     | Ctr                     | Myc                     | Ctr                     | Myc                     | Ctr                     | Myc                      | Ctr                      | Myc                     | Ctr                     |
| <b>Sample size</b> | 1150                    | 1020                    | 628                     | 634                     | 1147                    | 1001                    | 552                      | 634                      | 893                     | 594                     |
| <b>Min. value</b>  | 15                      | 15                      | 15                      | 15                      | 15                      | 15                      | 23                       | 23                       | 20                      | 20                      |
| <b>Max. value</b>  | 142                     | 62                      | 149                     | 114                     | 142                     | 68                      | 890                      | 768                      | 220                     | 118                     |
| <b>Average</b>     | 35.9<br>$\mu\text{m}^2$ | 32.7<br>$\mu\text{m}^2$ | 34.4<br>$\mu\text{m}^2$ | 32.4<br>$\mu\text{m}^2$ | 29.7<br>$\mu\text{m}^2$ | 31.2<br>$\mu\text{m}^2$ | 171.3<br>$\mu\text{m}^3$ | 165.8<br>$\mu\text{m}^3$ | 50.7<br>$\mu\text{m}^3$ | 40.3<br>$\mu\text{m}^3$ |
| <b>Median</b>      | 33<br>$\mu\text{m}^2$   | 32<br>$\mu\text{m}^2$   | 29<br>$\mu\text{m}^2$   | 30<br>$\mu\text{m}^2$   | 26<br>$\mu\text{m}^2$   | 30<br>$\mu\text{m}^2$   | 140.5<br>$\mu\text{m}^3$ | 141.5<br>$\mu\text{m}^3$ | 39<br>$\mu\text{m}^3$   | 36<br>$\mu\text{m}^3$   |
| <b>Stand. Dev.</b> | 16.5                    | 10.7                    | 19.3                    | 12.7                    | 14.2                    | 10.8                    | 132                      | 111.8                    | 33.8                    | 16.8                    |
| <b>Stand. Er.</b>  | 0.48                    | 0.33                    | 0.76                    | 0.5                     | 0.42                    | 0.34                    | 5.6                      | 4.4                      | 1.13                    | 0.68                    |
| <b>Skewness</b>    | 1.14 $\pm$<br>0.16      | 0.74 $\pm$<br>0.20      | 1.03 $\pm$<br>0.20      | 0.98 $\pm$<br>0.33      | 1.37 $\pm$<br>0.20      | 1.04 $\pm$<br>0.10      | 1.43 $\pm$<br>0.31       | 1.36 $\pm$<br>0.18       | 1.47 $\pm$<br>0.15      | 1.14 $\pm$<br>0.22      |
| <b>Kurtosis</b>    | 1.52 $\pm$<br>0.49      | 0.75 $\pm$<br>0.56      | 1.26 $\pm$<br>0.71      | 1.30 $\pm$<br>1.14      | 2.83 $\pm$<br>0.91      | 1.62 $\pm$<br>0.52      | 2.93 $\pm$<br>1.72       | 2.78 $\pm$<br>1.05       | 2.62 $\pm$<br>0.86      | 2.14 $\pm$<br>0.96      |
