# Supplementary material for: Size matters: three methods for estimating nuclear size in mycorrhizal roots of Medicago truncatula by image analysis
Source: PubMed Central journal article supplement (PMC6500585; doi:10.1186/s12870-019-1791-1), 2019-05-04

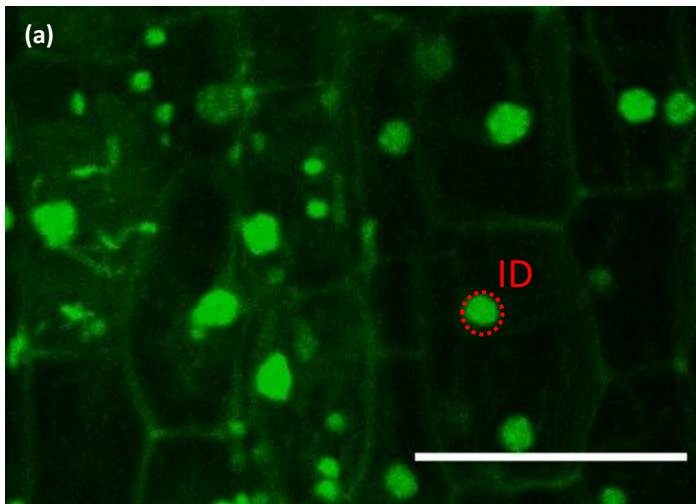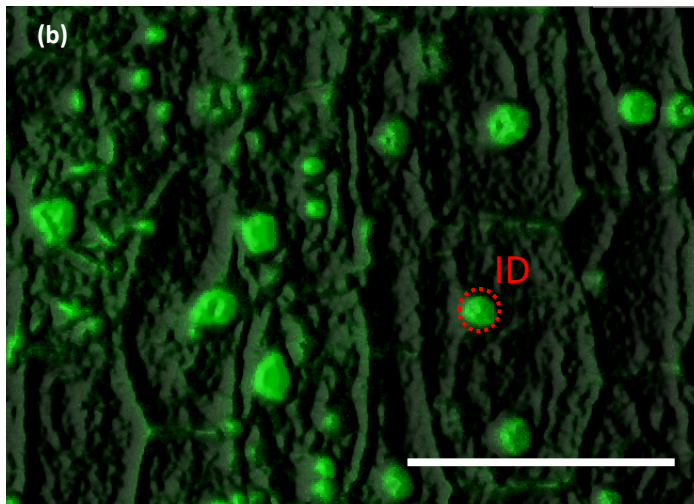

(c) (d)

$$\pi \cdot (d_{MAX}/2)^2$$

$$\sum_{i=1}^n \left[ \left( \pi \cdot \left( \frac{d_i}{2} \right)^2 \right) \cdot 1.5 \right]$$

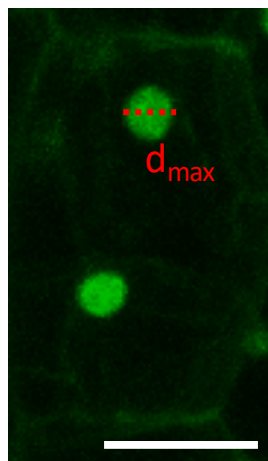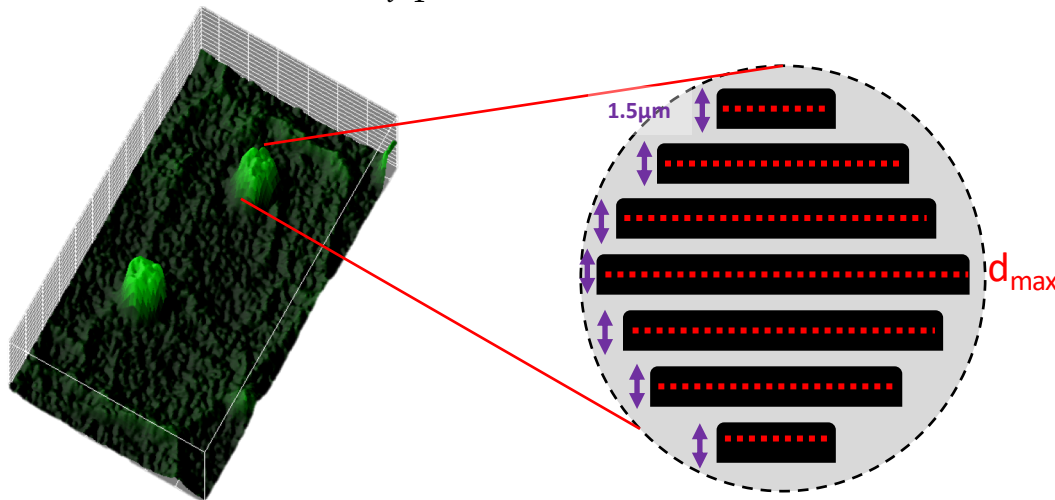

Supplement: 12870_2019_1791_MOESM2_ESM.pdf [file 12870_2019_1791_MOESM2_ESM.pdf]
