# Supplementary material for: Size matters: three methods for estimating nuclear size in mycorrhizal roots of Medicago truncatula by image analysis
Source: PubMed Central journal article supplement (PMC6500585; doi:10.1186/s12870-019-1791-1), 2019-05-04

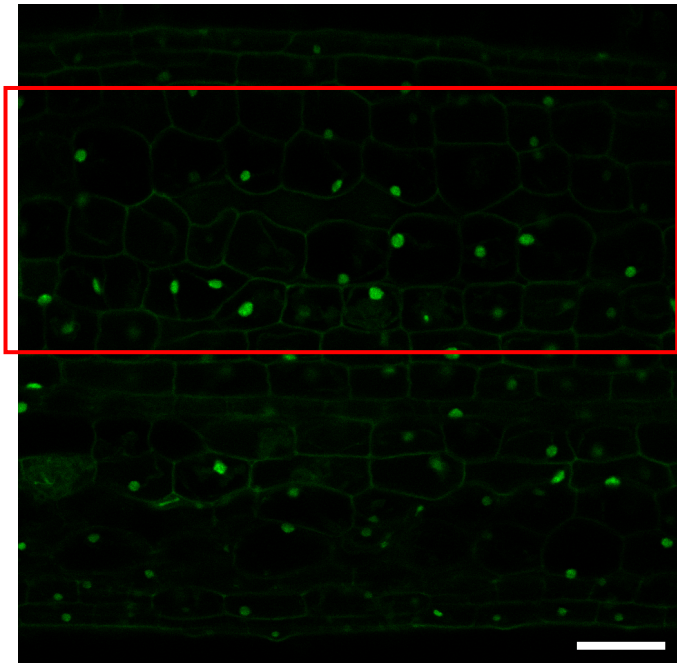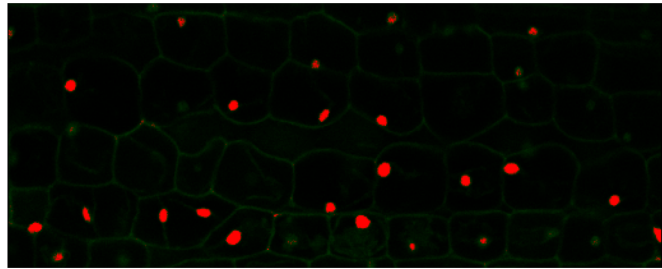

Supplement: 12870_2019_1791_MOESM6_ESM.pdf [file 12870_2019_1791_MOESM6_ESM.pdf]
