# Supplementary material for: Size matters: three methods for estimating nuclear size in mycorrhizal roots of Medicago truncatula by image analysis
Source: PubMed Central journal article supplement (PMC6500585; doi:10.1186/s12870-019-1791-1), 2019-05-04
Supplement: 12870_2019_1791_MOESM7_ESM.pdf [file 12870_2019_1791_MOESM7_ESM.pdf]

---

| <b>Putative<br/>ploidy<br/>levels</b> | <b>Sturges<br/>Classes</b> | <b>Mean values<br/>Wt Ctr</b> | <b>Mean values<br/>Wt Myc</b> |
|---------------------------------------|----------------------------|-------------------------------|-------------------------------|
| 2C                                    | 20-45 $\mu\text{m}^3$      | 30.3 $\pm$ 6.9                | 29.6 $\pm$ 7                  |
| 4C                                    | 45-70 $\mu\text{m}^3$      | 54.6 $\pm$ 7.1                | 55.2 $\pm$ 6.9                |
| 8C                                    | 70-95 $\mu\text{m}^3$      | 77.6 $\pm$ 7                  | 81 $\pm$ 6.9                  |
| 16C                                   | 95-120 $\mu\text{m}^3$     | 107 $\pm$ 9.6                 | 105.9 $\pm$ 7.1               |
| 32C                                   | 120-145 $\mu\text{m}^3$    |                               | 131.8 $\pm$ 7.9               |
| 64C                                   | 145-170 $\mu\text{m}^3$    |                               | 155.3 $\pm$ 7.6               |
| 128C                                  | 170-195 $\mu\text{m}^3$    |                               | 181 $\pm$ 4.2                 |
| 256C                                  | 195-220 $\mu\text{m}^3$    |                               | 210.2 $\pm$ 9.3               |

---
